# Supplementary material for: Rational synthesis of metal–organic framework composites, hollow structures and their derived porous mixed metal oxide hollow structures
Source: Royal Society of Chemistry journal article supplement (doi:10.1039/c5ta07085f), 2015-11-17
Supplement: c5ta07085f1.pdf [file c5ta07085f1.pdf]

## Electronic Supplementary Information

### **Rational synthesis of metal–organic framework composites, hollow structures and their derived porous mixed metal oxide hollow structures**

Daoping Cai, Bin Liu, Dandan Wang, Lingling Wang, Yuan Liu, Baihua Qu, Xiaochuan Duan, Qihong Li\* and Taihong Wang\*

Pen-Tung Sah Institute of Micro-Nano Science and Technology, Xiamen University,

Xiamen 361000, China.

\* Corresponding author: Taihong Wang, Qihong Li.

E-mail address: liqihong2004@hotmail.com, thwang@xmu.edu.cn.

Tel.: +86-0592-2183063;

Fax: +86-0592-2197196.

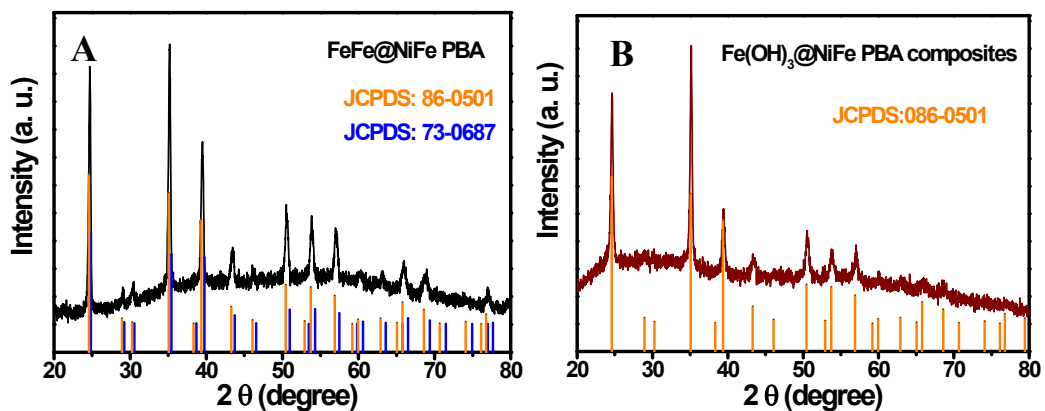

Figure S1. The XRD patterns of the (A) core-shell FeFe@NiFe PBA nanocubes and (B) Fe(OH)<sub>3</sub>@NiFe PBA composites.

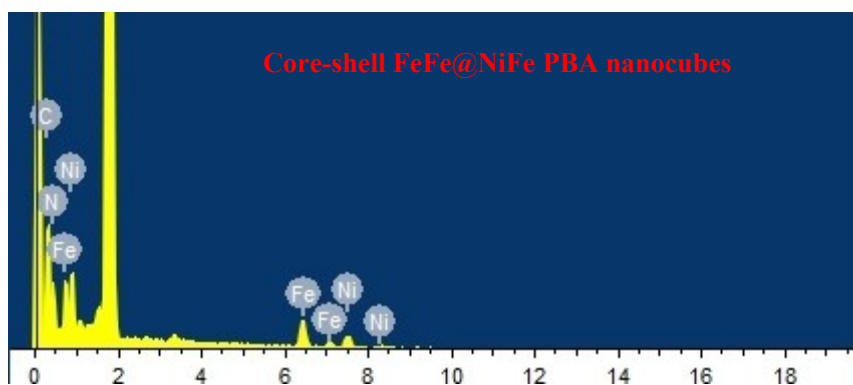

Figure S2. EDX analysis of the core-shell FeFe@NiFe PBA nanocubes.

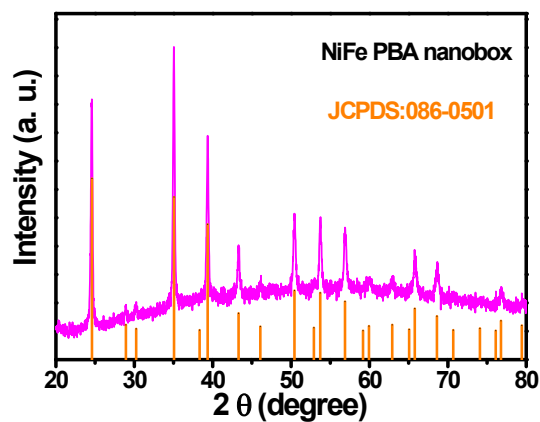

Figure S3. The XRD pattern of the hollow NiFe PBA nanoboxes.

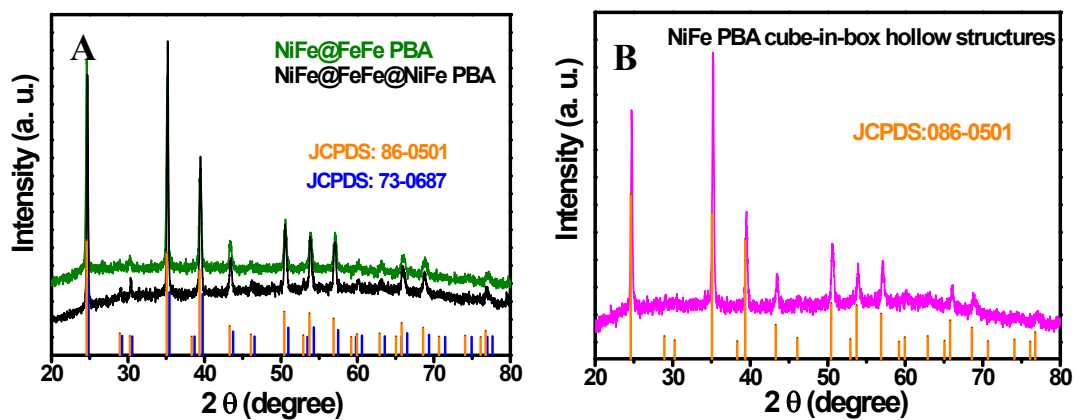

**Figure S4.** The XRD patterns of the (A) core-shell NiFe@FeFe and NiFe@FeFe@NiFe PBA nanocubes; (B) NiFe PBA cube-in-box hollow structures.

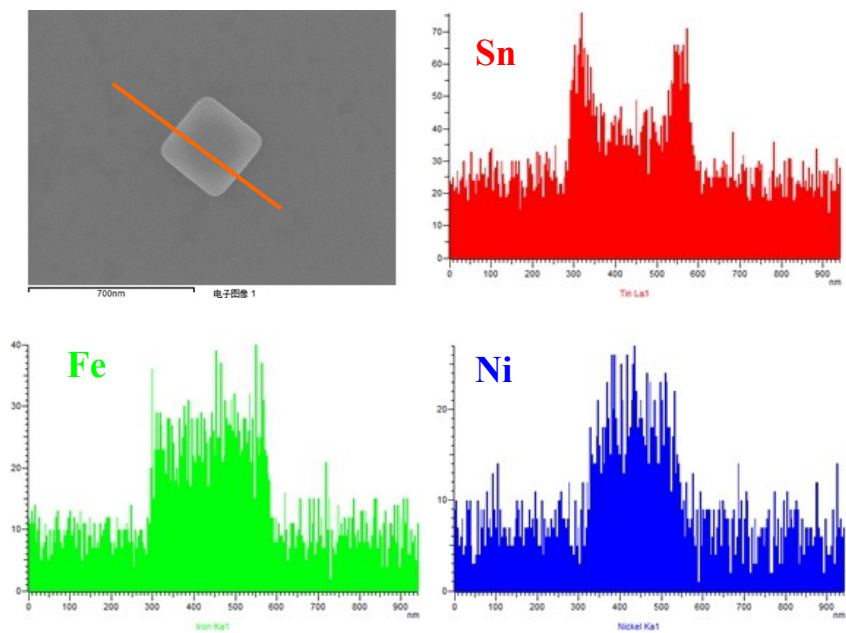

**Figure S5.** EDX analysis of the NiFe@Fe(OH)<sub>3</sub>/SnO<sub>2</sub>·xH<sub>2</sub>O composites.

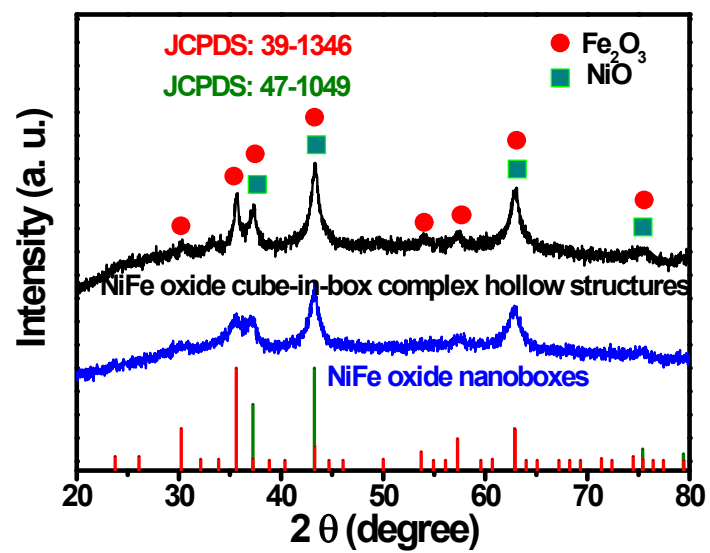

**Figure S6.** The XRD patterns of the NiFe oxide nanoboxes and cube-in-box complex hollow structures.

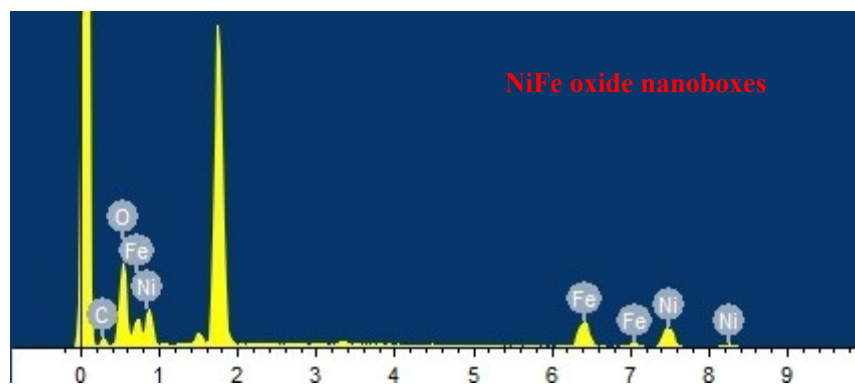

**Figure S7.** EDX analysis of the NiFe oxide nanoboxes.

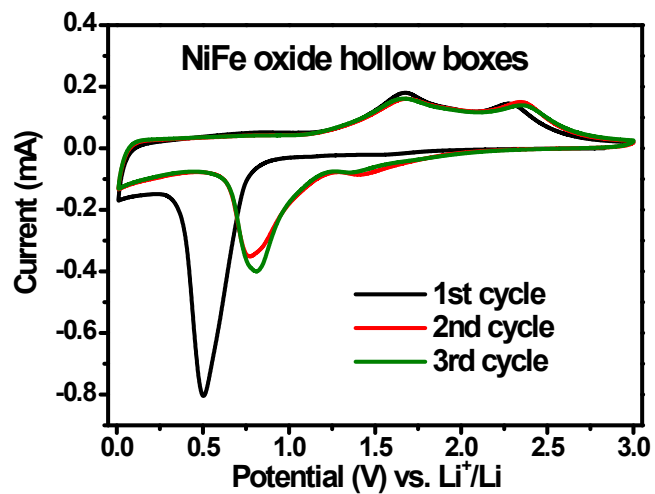

Figure S8. CV curves of the NiFe oxide hollow boxes at a scan rate of  $0.2 \text{ mV s}^{-1}$ .

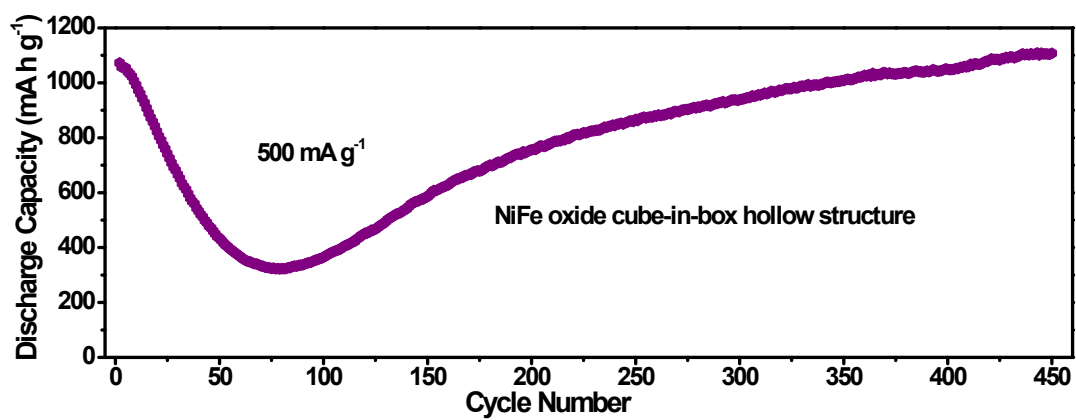

Figure S9. Cycling performance of the NiFe oxide cube-in-box complex hollow structures at a higher current density of  $500 \text{ mA g}^{-1}$  for 450 cycles.

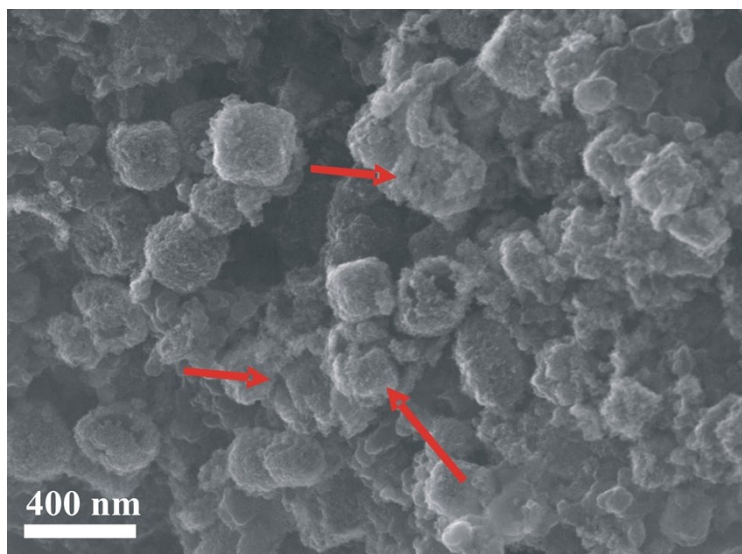

**Figure S10.** SEM image of the NiFe oxide cube-in-box complex hollow structures after 300 cycles.
